# Supplementary material for: Gut resistome plasticity in pediatric patients undergoing hematopoietic stem cell transplantation
Source: PubMed Central journal article supplement (PMC6449395; doi:10.1038/s41598-019-42222-w), 2019-04-04
Supplement: 41598_2019_42222_MOESM1_ESM.pdf [file 41598_2019_42222_MOESM1_ESM.pdf]

**Gut resistome plasticity in pediatric patients undergoing hematopoietic stem cell transplantation**

Federica D'Amico, Matteo Soverini, Daniele Zama, Clarissa Consolandi, Marco Severgnini, Arcangelo Prete, Andrea Pession, Monica Barone, Silvia Turrone, Elena Biagi, Patrizia Brigidi, Riccardo Masetti, Simone Rampelli and Marco Candela.

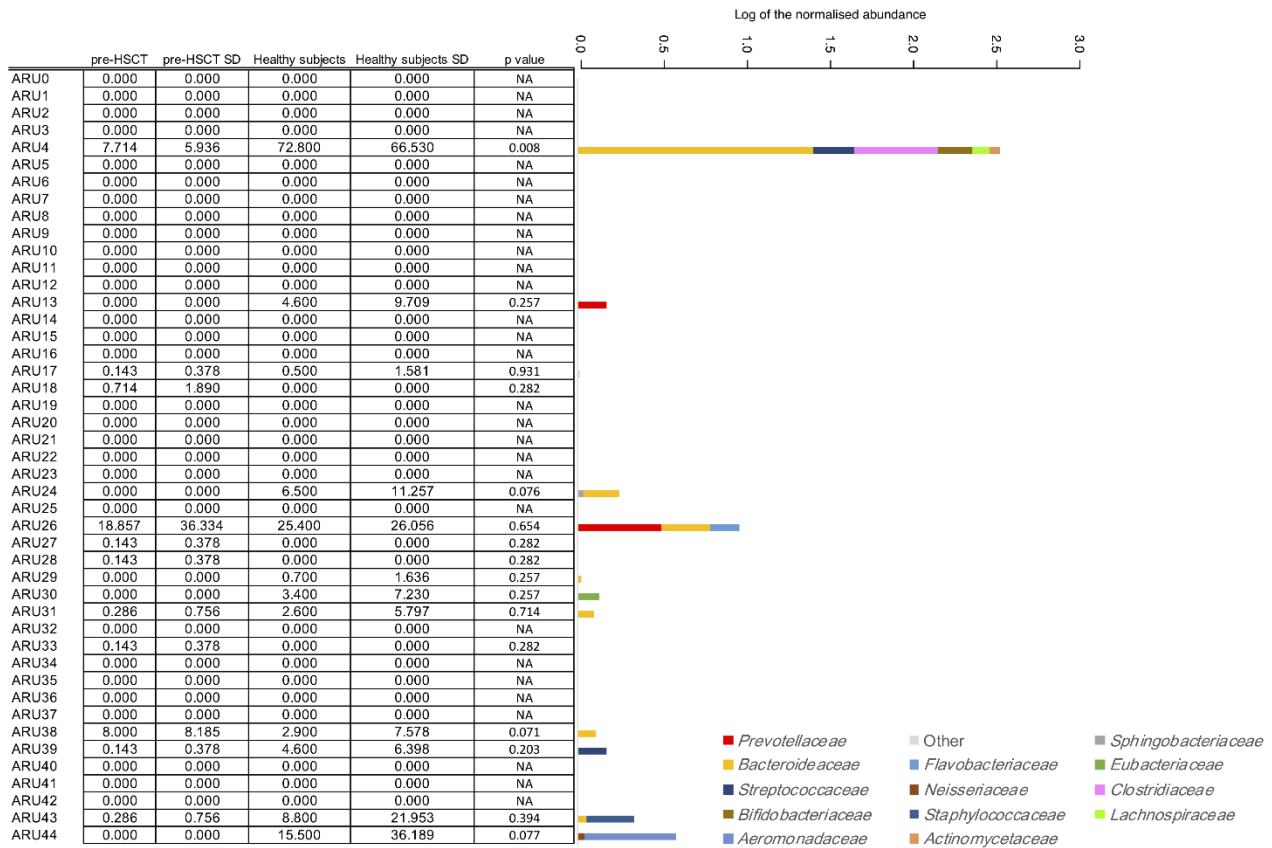

**Supplementary Figure 1.** Table showing the mean and standard deviation of the relative abundance of each ARU in the two groups analyzed: pre-HSCT samples and healthy subjects. Wilcoxon signed rank-sum test was used to assess significant difference between the two groups of subjects. Bar plots showing the normalized abundance of the families assigned to each ARU for healthy subjects are shown on the right.

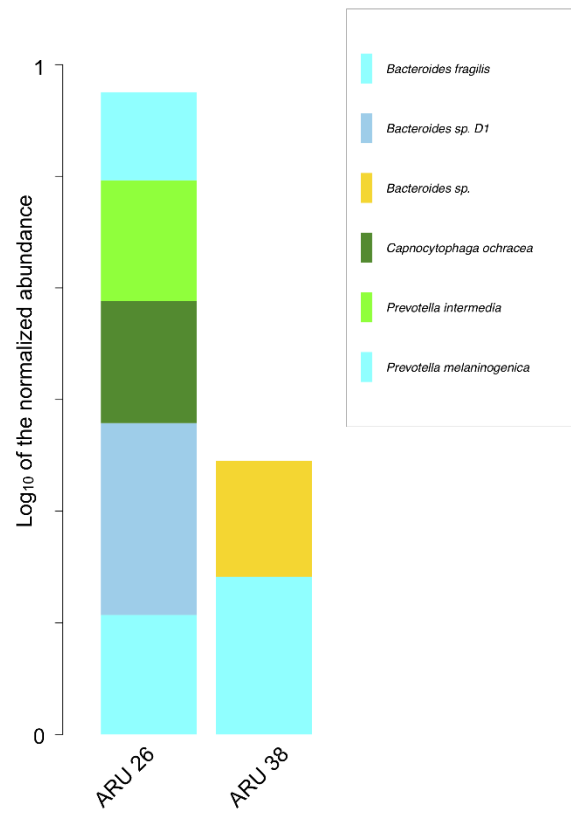

**Supplementary Figure 2.** Taxonomic classification to species level of ARU26 and ARU38.

**Supplementary Table 1.** Anagraphical and clinical information of the enrolled patients.

| Subject | Sex/Age | Diagnosis | Donor Type | Stem cell source | Conditioning regimen | aGvHD prophylaxis | TNC /Kg              | Engraftment (day) |     |       | aGvHD    |     |                            | Outcome            | Antibiotic prophylaxis  | Antibiotic treatment                                                                                   |
|---------|---------|-----------|------------|------------------|----------------------|-------------------|----------------------|-------------------|-----|-------|----------|-----|----------------------------|--------------------|-------------------------|--------------------------------------------------------------------------------------------------------|
|         |         |           |            |                  |                      |                   |                      | PMN               | PLT | Grade | Site     | Day | Therapy                    |                    |                         |                                                                                                        |
| 4       | F/12    | AML       | MUD        | BM               | BU+EDX+ L-PAM        | ATG-CSA-MTX       | 4.2x 10 <sup>8</sup> | +13               | +20 | I     | Skin     | +25 | Steroid                    | ANED 2 years       | Levofloxacin ± (-9/+21) | Ceftazidime* (+7/+13)<br>Piperacillin/tazobactam* (+13/+19)                                            |
| 11      | M/9     | ALL       | MUD        | BM               | BU+TT+EDX            | ATG-CSA-MTX       | 3.4x 10 <sup>8</sup> | +15               | +27 | II    | Skin     | +11 | Steroid                    | Dead from relapse  | Levofloxacin ± (-9+21)  | Ceftazidime* (+7/+19)<br>Amikacin# (+7/+21)                                                            |
| 5       | M/10    | ALL       | MFD        | BM               | BU+TT+EDX            | CSA               | 2.9x 10 <sup>8</sup> | +12               | +17 | III   | Skin     | +23 | Steroid-PHEC               | ANED 2 years +1/12 | Levofloxacin ± (-9/+21) | Ceftazidime* (-9/+7)<br>Piperacillin/tazobactam* (+7/+16)<br>Amikacin# (+3/+16)                        |
| 15      | M/8     | ALL       | MFD        | BM               | BU+TT+EDX            | CSA               | 5.8x 10 <sup>8</sup> | +12               | +17 | IV    | Skin, GI | +11 | Steroid-PHEC<br>Infliximab | ANED 1 year +6/12  | Levofloxacin ± (-9/+21) | Ceftazidime* (+8/+15)                                                                                  |
| 19      | F/10    | ALL       | MUD        | BM               | BU+TT+EDX            | ATG-CSA-MTX       | 7.1x 10 <sup>8</sup> | +34               | +35 |       |          |     |                            | ANED 1 year +3/12  | Levofloxacin ± (-9/+21) | Ceftazidime* (+9/+14)<br>Amikacin# (+11/+18)<br>Meropenem* (+14/+23, +34/+43)<br>Linezolid ± (+34/+41) |
| 16      | M/16    | ALL       | MFD        | BM               | BU+TT+EDX            | CSA               | 4.6x 10 <sup>8</sup> | +11               | +30 |       |          |     |                            | ANED 1 year +6/12  | Levofloxacin ± (-9/+21) | Ceftazidime* (+7/+16)<br>Piperacillin/tazobactam* (+16/+23)<br>Amikacin# (+9/+15)                      |

|                                                                                                                                                                                                                                                                                                                                                                                                                                                                                                                                                                                                                                                                                                                                  |     |     |     |    |                  |                 |                         |     |     |                         |                            |                                                        |
|----------------------------------------------------------------------------------------------------------------------------------------------------------------------------------------------------------------------------------------------------------------------------------------------------------------------------------------------------------------------------------------------------------------------------------------------------------------------------------------------------------------------------------------------------------------------------------------------------------------------------------------------------------------------------------------------------------------------------------|-----|-----|-----|----|------------------|-----------------|-------------------------|-----|-----|-------------------------|----------------------------|--------------------------------------------------------|
| 20                                                                                                                                                                                                                                                                                                                                                                                                                                                                                                                                                                                                                                                                                                                               | M/7 | ALL | MUD | BM | BU+TT+EDX        | ATG-CSA-MTX     | 4.8x<br>10 <sup>8</sup> | +12 | +15 | ANED 1<br>year<br>+4/12 | Levofloxacin<br>± (-9/+21) | Teicoplanin ±<br>(+9/+16)                              |
| 26                                                                                                                                                                                                                                                                                                                                                                                                                                                                                                                                                                                                                                                                                                                               | M/8 | AML | MUD | BM | BU+EDX+L-<br>PAM | ATG-CSA-<br>MTX | 7.2x<br>10 <sup>8</sup> | +12 | +21 | ANED 1<br>year<br>+9/12 | Levofloxacin<br>± (-9/+21) | Ceftazidime*<br>(+6/+19)<br>Teicoplanin ±<br>(+10/+21) |
| <p>Abbreviations: aGvHD=acute graft-versus-host disease; ALL=acute lymphoblastic leukemia; AML=acute myeloid leukemia; ANED=alive no evidence of disease; ATG=anti-thymocyte; BM=bone marrow; BU=busulfan; CSA=cyclosporin A; EDX=cyclophosphamide; F=female; GI=gastrointestinal tract; L-PAM=melphalan; M=male; MFD=match family donor; MTX= methotrexate; MUD=match unrelated donor; PHEC=extracorporeal photopheresis; PMN=polymorphonuclear neutrophil; PLT=platelets; TNC= total nucleated cells; TT=thiotepa; globulin.</p> <p>*Beta-lactam antibiotic; # Aminoglycoside antibiotic; ± Others. The numbers between parenthesis indicate the starting and the ending day for the antibiotic treatment post-transplant.</p> |     |     |     |    |                  |                 |                         |     |     |                         |                            |                                                        |

**Supplementary Table 2.** Classification of the Antibiotic Resistance Units (ARUs) detected in the gut resistome of pediatric patients undergoing HSCT and healthy patients. For each ARU, antibiotic class, identity name, resistance type and function are indicated.

| <b>Antibiotic Resistance Unit</b> | <b>Antibiotic Class</b> | <b>Identity Name</b> | <b>Resistance Type</b> | <b>Function</b>                                        |
|-----------------------------------|-------------------------|----------------------|------------------------|--------------------------------------------------------|
| [ARU0]                            | Multidrug resistance    | ZP_02346647          | acrb                   | Multidrug resistance efflux pump                       |
| [ARU1]                            | Tetracycline            | XP_002333050         | tetc                   | Tetracycline efflux pump                               |
| [ARU2]                            | Multidrug resistance    | YP_001460869         | mdto                   | Multidrug resistance efflux pump                       |
| [ARU3]                            | Polypeptide             | AAL23678             | arna                   | Resistance to polymyxin                                |
| [ARU4]                            | Tetracycline            | BAD46890             | tetq                   | Inhibition of tetracycline                             |
| [ARU5]                            | Macrolide               | BAB64542             | macb                   | Macrolide-specific efflux pump                         |
| [ARU6]                            | Fosfidomycin            | YP_001477377         | rosb                   | Efflux pump/potassium antiporter system                |
| [ARU7]                            | Multidrug resistance    | YP_002807373         | tolc                   | Multidrug resistance efflux pump                       |
| [ARU8]                            | Multidrug resistance    | ZP_04437889          | lsa                    | ABC efflux family that is resistant to MLS antibiotics |
| [ARU9]                            | Aminoglycoside          | BAG12278             | aac6ie                 | Aminoglycoside N-acetyltransferase                     |
| [ARU10]                           | Tetracycline            | P13924               | tetI                   | Tetracycline efflux pump                               |
| [ARU11]                           | Multidrug resistance    | YP_403489            | mdtk                   | Multidrug resistance efflux pump                       |
| [ARU12]                           | Beta-lactam antibiotics | ZP_04534300          | bl1_ec                 | Class C beta-lactamase                                 |
| [ARU13]                           | Beta-lactam antibiotics | ZP_03615711          | tet37                  | Inhibition of tetracycline                             |
| [ARU14]                           | Multidrug resistance    | ABE06672             | mdth                   | Multidrug resistance efflux pump                       |
| [ARU15]                           | Multidrug resistance    | BAG80136             | mdtm                   | Multidrug resistance efflux pump                       |
| [ARU16]                           | Multidrug resistance    | BAA35851             | mdtg                   | Multidrug resistance efflux pump                       |
| [ARU17]                           | Tetracycline            | ACI02010             | tet40                  | Tetracycline efflux pump                               |
| [ARU18]                           | Macrolide               | AAQ62546             | mefa                   | Macrolide efflux pump                                  |
| [ARU19]                           | Multidrug resistance    | YP_002396538         | acra                   | Multidrug resistance efflux pump                       |
| [ARU20]                           | Multidrug resistance    | CAS09877             | bcr                    | Multidrug efflux system                                |
| [ARU21]                           | Multidrug resistance    | YP_002393667         | emrd                   | Multidrug resistance efflux pump                       |
| [ARU22]                           | Multidrug resistance    | ZP_04439153          | emea                   | Multidrug resistance efflux pump                       |

|         |                         |              |            |                                                |
|---------|-------------------------|--------------|------------|------------------------------------------------|
| [ARU23] | Multidrug resistance    | ZP_03063399  | mdtl       | Multidrug resistance efflux pump               |
| [ARU24] | Tetracycline            | CAC47932     | tetx       | Tetracycline modification                      |
| [ARU25] | Multidrug resistance    | YP_410370    | mdtn       | Multidrug resistance efflux pump               |
| [ARU26] | Beta-lactam antibiotics | ZP_04543532  | bl2e_cfxa  | Class A beta-lactamase                         |
| [ARU27] | Sulphonamide            | YP_001969930 | sul2       | Sulfonamide-resistant dihydropteroate synthase |
| [ARU28] | Macrolide               | AAG14406     | mpha       | Macrolide phosphotransferase                   |
| [ARU29] | Beta-lactam antibiotics | ZP_02068298  | bl2e_cepa  | Class A beta-lactamase                         |
| [ARU30] | Polypeptide             | YP_002937728 | backa      | Undecaprenyl pyrophosphate phosphatase         |
| [ARU31] | Aminoglycoside          | ABP57330     | ant6ia     | Aminoglycoside O-nucleotidyltransferase        |
| [ARU32] | Aminoglycoside          | ACI02996     | aac3iia    | Aminoglycoside N-acetyltransferase             |
| [ARU33] | Macrolide               | ZP_03973325  | ermx       | Resistance to erythromycin                     |
| [ARU34] | Aminoglycoside          | CAZ48657     | aph6id     | Aminoglycoside O-phosphotransferase            |
| [ARU35] | Beta-lactam antibiotics | ACO55744     | bl2d_oxa1  | Class D beta-lactamase                         |
| [ARU36] | Aminoglycoside          | BAE76038     | ksga       | Kasugamycin resistance                         |
| [ARU37] | Lincosamide             | AAL05554     | lnub       | Lincosamide nucleotidyltransferase             |
| [ARU38] | Macrolide               | AAA27431     | ermf       | Resistance to erythromycin                     |
| [ARU39] | Aminoglycoside          | CAP17165     | aph3iia    | Aminoglycoside O-phosphotransferase            |
| [ARU40] | Beta-lactam antibiotics | ACI47262     | bl2be_ctxm | Class A beta-lactamase                         |
| [ARU41] | Aminoglycoside          | CAQ06465     | aadd       | Aminoglycoside O-nucleotidyltransferase        |
| [ARU42] | Beta-lactam antibiotics | CAH41960     | bl3_ccra   | Class B beta-lactamase                         |
| [ARU43] | Macrolide               | BAH18720     | ermb       | Resistance to erythromycin                     |
| [ARU44] | Cloramphenicol          | YP_001144149 | cata13     | Group A chloramphenicol acetyltransferase      |
